# Supplementary material for: Reaction route control by microperoxidase-9/CTAB micelle ratios
Source: Royal Society of Chemistry journal article supplement (doi:10.1039/b601671e), 2006-01-01
Supplement: b601671e.pdf [file b601671e.pdf]

Supplemental Material

Electrochemical data of Microperoxidases in phosphate buffer and CTAB micelles

Table S1. MP-11 in phosphate buffer

| Sweep rate ( $\text{mV}\cdot\text{s}^{-1}$ ) | $E_{pc}$ (mA) | $E_{pa}$ (mA) | $\Delta E_p$ (mA) | $E_{1/2}$ (mV) |
|----------------------------------------------|---------------|---------------|-------------------|----------------|
| 10                                           | 381           | 321           | 60                | 351            |
| 20                                           | 382           | 314           | 68                | 348            |
| 50                                           | 384           | 303           | 81                | 343.5          |
| 100                                          | 388           | 300           | 88                | 344            |
| 200                                          | 394           | 293           | 101               | 343.5          |
| 400                                          | 400           | 291           | 109               | 345.5          |

Table S2. MP-11 in CTAB micelles

| Sweep rate ( $\text{mV}\cdot\text{s}^{-1}$ ) | $E_{pc}$ (mA) | $E_{pa}$ (mA) | $\Delta E_p$ (mA) | $E_{1/2}$ (mV) |
|----------------------------------------------|---------------|---------------|-------------------|----------------|
| 10                                           | 307           | 249           | 57                | 278            |
| 20                                           | 307.5         | 249.5         | 58                | 278.5          |
| 50                                           | 308           | 249           | 59                | 278.5          |
| 100                                          | 310           | 247           | 71                | 276.5          |
| 200                                          | 311           | 235           | 76                | 273            |
| 400                                          | 314           | 228           | 86                | 271            |

Table S3. MP-9 in phosphate buffer

| Sweep rate ( $\text{mV}\cdot\text{s}^{-1}$ ) | $E_{pc}$ (mV) | $E_{pa}$ (mV) | $\Delta E_p$ (mV) | $E_{1/2}$ (mV) |
|----------------------------------------------|---------------|---------------|-------------------|----------------|
| 10                                           | 391           | 333           | 58                | 362            |
| 20                                           | 393           | 329           | 64                | 361            |
| 50                                           | 399           | 323           | 76                | 361            |
| 100                                          | 406           | 313           | 93                | 359.5          |
| 200                                          | 411           | 309           | 102               | 360            |
| 400                                          | 420           | 294           | 126               | 357            |

Table S4. MP-9 in CTAB micelles

| Sweep rate ( $\text{mV}\cdot\text{s}^{-1}$ ) | $E_{pc}$ (mV) | $E_{pa}$ (mV) | $\Delta E_p$ (mV) | $E_{1/2}$ (mV) |
|----------------------------------------------|---------------|---------------|-------------------|----------------|
| 10                                           | 260.5         | 203.5         | 57                | 232            |
| 20                                           | 261.2         | 203.2         | 57.7              | 232.2          |
| 50                                           | 261           | 203           | 58                | 232            |
| 100                                          | 259.5         | 201           | 58.5              | 230.25         |
| 200                                          | 260           | 200.5         | 59.5              | 230.25         |
| 400                                          | 258           | 198           | 60                | 228            |

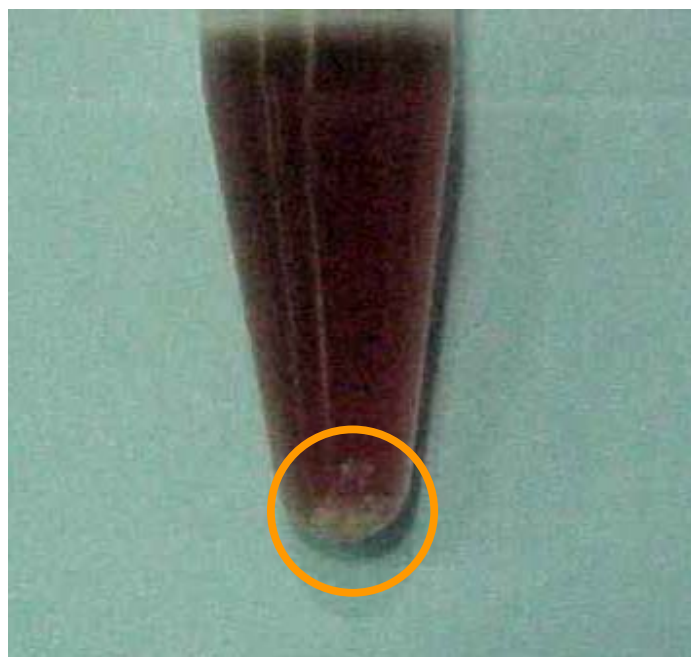

Fig. S1. Photo of the Eppendorf tube containing MP-9/CTAB 20 min after the addition of 0.2 mM DPAA. At the bottom of the tube it is possible to see benzophenone crystals that precipitated.
